1

## 2 **Brain connectivity during Alzheimer's disease progression and its** 3 **cognitive impact in a transgenic rat model.**

4 **Emma Muñoz-Moreno<sup>1,2</sup>, Raúl Tudela<sup>3,1</sup>, Xavier López-Gil<sup>1</sup>,**  
5 **and Guadalupe Soria<sup>1,3</sup>**

6 <sup>1</sup>Experimental 7T MRI Unit, Institut d'Investigacions Biomèdiques August Pi i Sunyer (IDIBAPS), Barcelona, Spain

7 <sup>2</sup>Magnetic Resonance Image Core Facility, Institut d'Investigacions Biomèdiques August Pi i Sunyer (IDIBAPS), Barcelona, Spain

8 <sup>3</sup>Consorcio Centro de Investigación Biomédica en Red (CIBER) de Bioingeniería, Biomateriales y Nanomedicina (CIBER-BBN), Group of Biomedical Imaging, University of  
9 Barcelona, Barcelona, Spain

10 **Keywords:** Alzheimers disease continuum, animal models, TgF344-AD, connectomics, brain networks, longitudinal  
11 evolution.

---

### ABSTRACT

12 The research of Alzheimer's disease (AD) in their early stages and its progression till symptomatic onset  
13 is essential to understand the pathology and investigate new treatments. Animal models provide a helpful  
14 approach to this research, since they allow for controlled follow-up during the disease evolution. In this  
15 work, transgenic TgF344-AD rats were longitudinally evaluated starting at 6 months of age. Every 3  
16 months, cognitive abilities were assessed by a memory-related task and magnetic resonance imaging  
17 (MRI) was acquired. Structural and functional brain networks were estimated and characterized by graph  
18 metrics to identify differences between the groups in connectivity, its evolution with age, and its influence  
19 on cognition. Structural networks of transgenic animals were altered since the earliest stage. Likewise,  
20 aging significantly affected network metrics in TgF344-AD, but not in the control group. In addition,  
21 while the structural brain network influenced cognitive outcome in transgenic animals, functional  
22 network impacted how control subjects performed. TgF344-AD brain network alterations were present  
23 from very early stages, difficult to identify in clinical research. Likewise, the characterization of aging in  
24 these animals, involving structural network reorganization and its effects on cognition, opens a window to  
25 evaluate new treatments for the disease.

## AUTHOR SUMMARY

26 We have applied magnetic resonance image based connectomics to characterize TgF344-AD rats, a  
27 transgenic model of Alzheimer's disease (AD). This represents a highly translational approach, what is  
28 essential to investigate potential treatments. TgF344-AD animals were evaluated from early to advanced  
29 ages to describe alterations in brain connectivity and how brain networks are affected by age. Results  
30 showed that aging had a bigger impact in the structural connectivity of the TgF344-AD than in control  
31 animals, and that changes in the structural network, already observed at early ages, significantly  
32 influenced cognitive outcome of transgenic animals. Alterations in connectivity were similar to the  
33 described in AD human studies, and complement them providing insights into earlier stages and a plot of  
34 AD effects throughout the whole life span.

---

## INTRODUCTION

35 Alzheimer's disease (AD) is a neurodegenerative disease related to most cases of dementia in elderly  
36 population. Brain damage associated to AD starts decades before the symptomatic onset and clinical  
37 diagnose, which has led to consider AD as a continuum (Dubois et al., 2016; Jack et al., 2018). This fact  
38 makes the research of disease progression from very early stages a key point to understand AD and  
39 develop potential pharmacological treatments or other type of interventions. Consequently, it is essential  
40 the identification before the diagnose stage of cohorts of at-risk population to follow them up during  
41 years until AD symptoms appear. Recently, studies performed on AD risk population such as carriers of  
42 apolipoprotein E (APOE)- $\epsilon$ 4 or rs405509 alleles have detected brain differences between these subjects  
43 and control subjects in elderly (Chen et al., 2015; Reiter et al., 2017; Shu et al., 2015) and middle age  
44 population (Cacciaglia et al., 2018; Habib et al., 2017; Mak et al., 2017; ten Kate et al., 2016). However,  
45 the identification of at-risk cohorts is challenging and the time required to follow-up them from  
46 middle-age to the eventual advanced phase of AD hinders the characterization of the disease progression  
47 in patient cohorts. In this sense, animal models provide a helpful approach to evaluate the development of  
48 AD from early to advanced stages (Do Carmo & Cuello, 2013; Galeano et al., 2014; Leon et al., 2010;  
49 Sabbagh, Kinney, & Cummings, 2013). These models allow the study of earlier stages of the disease, as  
50 well as the follow-up of the same subjects during the whole extent of the disease in a relatively short

51 period. An example of AD animal model are TgF344-AD rats. They progressively manifest most  
52 pathological hallmarks of the disease including amyloid plaques, tau pathology, oligomeric amyloid  $\beta$   
53 ( $A\beta$ ), neuronal loss and behavioral impairment (Cohen et al., 2013; Drummond & Wisniewski, 2017).  
54 Therefore, it is a very suitable model to evaluate AD progression during aging.

55 Along with the choice of proper animal models, the use of replicable techniques in experimental and  
56 clinical research can improve translationality (Sabbagh et al., 2013). This is a crucial point given the high  
57 failure rates in the translation between preclinical and clinical trials reported in drug research for AD  
58 (Drummond & Wisniewski, 2017; Windisch, 2014). Neuroimaging techniques have been extensively  
59 used to identify alterations associated to the disease in a non-invasive way and can be applied in both  
60 animal and human cohorts (Sabbagh et al., 2013). In the search for AD biomarkers, magnetic resonance  
61 imaging (MRI) has represented a helpful technique to characterize in-vivo brain changes during AD  
62 progression (Jack et al., 2015), such as atrophy (Frisoni, Fox, Jack, Scheltens, & Thompson, 2010) or  
63 tissue changes (Weston, Simpson, Ryan, Ourselin, & Fox, 2015). In addition, MRI can be used to  
64 identify and describe structural and functional brain networks. For this reason it has been used to  
65 investigate and support the hypothesis of AD as a disconnection syndrome (Brier et al., 2014;  
66 Gomez-Ramirez & Wu, 2014; Palesi et al., 2016; Xie & He, 2012), suggesting that cognitive decline in  
67 AD is related to functional or structural disconnection between regions rather than localized changes in  
68 specific isolated brain areas. Thus, impairment in structural connectivity associated to AD has been  
69 described based on gray matter patterns evaluated in structural MRI or, mainly, based on the fiber tract  
70 estimations obtained from diffusion weighted MRI (Daianu et al., 2013; Fischer, Wolf, Scheurich, &  
71 Fellgiebel, 2015; Lo et al., 2010; Wee et al., 2011). Likewise, functional disconnection has been  
72 evaluated using resting-state functional MRI (rs-fMRI) and graph theory to estimate and quantify  
73 functional network (Brier et al., 2014; Sanz-Arigita et al., 2010; Supekar, Menon, Rubin, Musen, &  
74 Greicius, 2008); identifying resting-state networks using independent component analysis (Badhwar et  
75 al., 2017); or characterizing connectivity between a specific region and the rest of the brain (Gour et al.,  
76 2014). Indeed, alterations in structural and functional brain network properties have been described in  
77 TgF344-AD animals at early ages (5-6 months) (Muñoz-Moreno, Tudela, López-Gil, & Soria, 2018) as  
78 well as differences in functional connectivity of specific regions or networks at several time points from 6  
79 to 18 months (Anckaerts et al., 2019; Tudela, Muñoz-Moreno, Sala-Llonch, López-Gil, & Soria, 2019).

80 Among the MRI-based studies of AD as a disconnection syndrome, graph theory metrics have become  
81 one of the most applied methods to investigate the organization at a global level of both structural  
82 (Daianu et al., 2013; Fischer et al., 2015; Lo et al., 2010; Muñoz-Moreno et al., 2018; Wee et al., 2011)  
83 and functional (Brier et al., 2014; Muñoz-Moreno et al., 2018; Sanz-Arigita et al., 2010; Supekar et al.,  
84 2008) brain networks. Graph metrics provide a quantitative description of different aspects of the  
85 network such as integration, segregation or strength, and they allow to perform similar and comparable  
86 analyses in structural and functional networks. Since global graph metrics quantify the whole brain  
87 structure, they are more sensitive to global reorganization of the networks rather than isolated alterations  
88 in individual connections (Rubinov & Sporns, 2010).

89 Therefore, in the present study, we use graph theory to investigate how the disease progression affects  
90 both structural and functional brain networks and its effects in cognitive abilities. In this line, we  
91 evaluated how the connectivity impairments observed in young TgF344-AD animals in our previous  
92 work (Muñoz-Moreno et al., 2018) evolve during aging. Structural and functional MRI acquisitions were  
93 acquired every 3 months from 6 to 18 months of age in a cohort of TgF344-AD and control rats to  
94 perform a longitudinal analysis of brain connectivity. Cognitive skills were also evaluated every 3 months  
95 to test the impact of connectivity alterations in cognition. Hence, this work aims to contribute to the  
96 understanding of AD progression and its association with cognitive decline from the perspective of the  
97 disease as a disconnection syndrome.

## MATERIALS AND METHODS

### 98 *Subjects*

99 The experiments were performed in a cohort of 18 male Fisher rats including TgF344-AD animals  
100 (Cohen et al., 2013) and their wild-type littermates, which were evaluated at 5 time points. Table 1 shows  
101 the details on the resulting sample size and average age per time point after MRI experiments.

105 The animals were housed in cages under controlled temperature ( $21 \pm 1^\circ\text{C}$ ) and humidity ( $55 \pm 10\%$ )  
106 with a 12-hour light/12-hour dark cycle. Food and water were available ad libitum during all the  
107 experiment, except during behavioral test periods as explained below. At 2 months of age, animals start a  
108 cognitive training to perform delay non-matched sample (DNMS) task. Once the learning criteria was  
109 achieved, their performance in DNMS was evaluated and the first MRI scan was acquired. Afterwards,

102 **Table 1.** Sample size and age (median  $\pm$  interquartile range) at each of the 5 acquisitions. Sample size in time point 1 is different in the structural and  
103 functional analysis (\*corresponds to the number of rs-fMRI acquisitions). Variability in the age of acquisition at the first time point is due to differences in the  
104 cognitive training duration. Age difference between the groups was not significant.

|              | Control |                  | TgF344-AD |                  |
|--------------|---------|------------------|-----------|------------------|
|              | N       | Age (months)     | N         | Age(months)      |
| Time point 1 | 8/5*    | 5.33 $\pm$ 0.3   | 8/7*      | 6.33 $\pm$ 1.22  |
| Time point 2 | 9       | 9.2 $\pm$ 0.5    | 8         | 8.67 $\pm$ 0.2   |
| Time point 3 | 7       | 11.3 $\pm$ 0.22  | 9         | 11.3 $\pm$ 0.03  |
| Time point 4 | 8       | 14.9 $\pm$ 0.425 | 9         | 14.87 $\pm$ 0.03 |
| Time point 5 | 8       | 17.92 $\pm$ 0.52 | 6         | 18.03 $\pm$ 0.62 |

110 two weeks of DNMS sessions followed by MRI acquisition were repeated every three months resulting in  
111 five evaluated time points.

#### 112 *Cognitive function evaluation*

113 Every three months, working memory was evaluated by DNMS test, following the procedure described in  
114 Muñoz-Moreno et al. (2018). DNMS was carried out in isolated operant chambers (Med Associates,  
115 USA), equipped with a pellet dispenser and three retractable levers, two of them in the wall where the  
116 pellet is (right and left levers) and the other in the opposite side (center lever). During the testing weeks,  
117 rats were food-deprived, receiving 75% of the usual food intake. In brief, DNMS requires the animal to  
118 press the levers following a specific sequence to obtain a pellet. First, in the sample phase, right or left  
119 lever appeared and after the animal pressed it, a delay randomly timed between 1 and 30 seconds started,  
120 after which the center lever appeared. When the animal pressed it both right and left levers were extended  
121 again. Correct response required a press on the lever opposite to the presented in the sample phase. Each  
122 DNMS session finished after 90 minutes or when 90 trials were completed. The number of trials and  
123 percentage of correct responses were recorded.

124 Before the first test, animals underwent a habituation and training phase to acquire the required skills.  
125 This phase started when the animals were two months old and finished when they achieved an acquisition

126 criteria as explained in Muñoz-Moreno et al. (2018). After that, animals underwent 15 DNMS sessions  
127 (five sessions per week) to evaluate and consolidate the learnt task. At each of the following four time  
128 points, animals performed 10 DNMS sessions (two weeks).

### 129 *Magnetic Resonance Imaging*

130 MRI acquisitions were performed on a 7.0T BioSpec 70/30 horizontal animal scanner (Bruker BioSpin,  
131 Ettlingen, Germany). Animals were placed in the supine position in a Plexiglas holder with a nose cone  
132 for administering anesthetic gases (1.5% isoflurane in a mixture of 30%  $O_2$  and 70%  $CO$ ) and were fixed  
133 using tooth and ear bars and adhesive tape. The rat received a 0.5 ml bolus of medetomidine (0.05 mg/kg;  
134 s.c.) and a catheter was implanted in its back for continuous perfusion of medetomidine. Isoflurane was  
135 gradually decreased until 0% and 15 minutes after the bolus the medetomidine perfusion (0.05 mg/kg;  
136 s.c.) started at rate 1 ml/hour. The acquisition protocol included:

- 137     ▪ T2-weighted images, acquired using a RARE sequence with effective echo time  $TE = 35.3$  ms,  
138       repetition time  $TR = 6000$  ms and RARE factor = 8, voxel size =  $0.12 \times 0.12$  mm<sup>2</sup>, 40 slices, slice  
139       thickness = 0.8 mm and field of view  $FoV = 30 \times 30 \times 32$  mm<sup>3</sup>.
- 140     ▪ T1-weighted images, acquired using an MDEFT protocol with  $TE = 2$  ms,  $TR = 4000$  ms, voxel  
141       size =  $0.14 \times 0.14 \times 0.5$  mm<sup>3</sup> and  $FoV = 35 \times 35 \times 18$  mm<sup>3</sup>.
- 142     ▪ Diffusion weighted images (DWI) using a spin-echo EPI sequence with  $TE = 24.86$  ms,  
143        $TR = 15000$  ms, four segments, 60 gradient directions with b-value =  $1000$  s/mm<sup>2</sup> and five volumes  
144       with b-value =  $0$  s/mm<sup>2</sup>; voxel size =  $0.31 \times 0.31 \times 0.31$  mm<sup>3</sup> and  $FoV = 22.23 \times 22.23 \times 18.54$  mm<sup>3</sup>.
- 145     ▪ rs-fMRI using a gradient echo T2\* acquisition, with the following parameters:  $TE = 10.75$  ms,  
146        $TR = 2000$  ms, 600 volumes (20 minutes), voxel size =  $0.4 \times 0.4 \times 0.6$  mm<sup>3</sup>,  $FoV = 25.6 \times 25.6 \times$   
147        $20.4$  mm<sup>3</sup>. rs-fMRI acquisition is scheduled after anatomical and diffusion MRI to ensure that  
148       isoflurane dose has been removed and the animals are sedated only by medetomidine.

149 To illustrate the acquisition quality, Supplementary Figure 1 shows a series of slices of colored  
150 fractional anisotropy computed in a randomly selected subject of the cohort; and Supplementary Figure 2  
151 displays a selection of functional networks extracted from the whole cohort using independent  
152 component analysis (ICA).

153 *Image processing and connectome definition*

154 The acquired images were processed to obtain the structural and functional connectomes following the  
155 methodology described in Muñoz-Moreno et al. (2018). Briefly, a rat brain atlas was registered to the  
156 T2-weighted images to obtain brain masks and region parcellations (Schwarz et al., 2006). T1-weighted  
157 images were used to segment the brain into white matter (WM), gray matter (GM) and cerebrospinal  
158 fluid (CSF) based on tissue probability maps registered from an atlas (Valdés-Hernández et al., 2011) to  
159 each subject brain. Parcellation and segmentation were registered from T2/T1-weighted volumes to DWI  
160 and rs-fMRI spaces to define the regions between which connectivity was assessed.

161 Fiber tract trajectories were estimated from DWI volumes using deterministic tractography based on  
162 constrained spherical deconvolution model, considering WM voxels as seed points. Dipy was used to  
163 process DWI volumes and estimate the fiber tracts (Garyfallidis et al., 2014). The resulting number of  
164 streamlines generated per subject are of the order of  $10^5$  ( $6.18 \cdot 10^5 \pm 0.67 \cdot 10^5$ ). As defined in  
165 Muñoz-Moreno et al. (2018), the structural connectome included 76 regions. Connection between two  
166 regions was defined if at least one streamline started in one region and ended in the other. The resulting  
167 structural connectomes have an average density of  $62.22 \pm 2.78$ . Three connectomes were considered  
168 according to the connection weight definition:

- 169     ▪ Fractional anisotropy (FA) weighted connectome (FA-w): The connection weight between two  
170       regions is defined as the average FA in the streamlines connecting them.
- 171     ▪ Fiber density (FD) weighted connectome (FD-w): The connection weight between two regions is  
172       computed as the number of streamlines normalized by the region volumes and the streamline length  
173       (Muñoz-Moreno et al., 2018).
- 174     ▪ Structural binary connectome: connection weight is 1 between connected regions and zero  
175       otherwise.

176 rs-fMRI was processed to obtain the average time series in the GM voxels of each of the regions of  
177 interest. Preprocessing includes slice timing, motion correction by spatial realignment using SPM8, and  
178 correction of EPI distortion by elastic registration to the T2-weighted volume using ANTs (Avants,  
179 Epstein, Grossman, & Gee, 2008). Afterwards, NiTime (<http://nipy.org/nitime/>) was used for z-score  
180 normalization and detrending of the time series, smoothing with an FWHM of 1.2 mm, frequency

181 filtering between 0.01 and 0.1 Hz, and regression by motion parameters and WM and CSF average  
182 signals. Since brain activity identified by rs-fMRI has been constrained to GM (Power, Plitt, Laumann, &  
183 Martin, 2017), only regions comprising GM tissue were considered as nodes in the functional  
184 connectome (54 regions). Both weighted and binary functional connectomes were defined. The  
185 connection weight was the partial correlation between the pair of regional time series, transformed by  
186 Fisher's  $z$ -transformation. Negative correlation coefficients were excluded since the proposed analysis is  
187 based on graph theory metrics that are not defined for signed edges (Fornito, Zalesky, & Breakspear,  
188 2013). All the connections with positive weight ( $z > 0$ ) were considered. Binary functional connectome  
189 was defined setting to one connections were  $z > 0$  and zero otherwise. The resulting functional  
190 connectomes have an average density of  $27.72 \pm 0.53$ .

#### 191 *Brain network analysis*

192 Brain network organization was described using graph theory metrics, including degree, strength,  
193 clustering coefficient and local and global efficiency. These metrics provide a description of different  
194 aspects of brain networks at a global level: network density, integration and segregation (Rubinov &  
195 Sporns, 2010).

196 Nodal degree measures the number of connections of a region. Nodal strength is computed as the sum  
197 of the region connection weights. Network degree and strength are respectively the nodal degree and  
198 strength averaged in all the brain regions. Higher network degree/strength indicates more or stronger  
199 connections. Global efficiency measures network integration: the ability to combine information from  
200 different regions. It is inversely related with the shortest path length between each pair of nodes. Higher  
201 global efficiency characterizes stronger and faster communication through the network. Network  
202 segregation, the ability for specialized processing within densely interconnected groups of regions, was  
203 quantified by local efficiency and clustering coefficient. Local efficiency is the average in the whole  
204 network of the nodal efficiencies (efficiency of the subnetwork associated to a region). Clustering  
205 coefficient is the average of the nodal clustering coefficients, which measure the number of neighbors of  
206 a node that are also neighbors with each other. High values of these metrics are related to highly  
207 segregated and connected networks. In this way, alterations in the whole-brain organization were  
208 evaluated using the same kind of measures in both structural and functional connectomes. Nonetheless,



209 the interpretation of these parameters must take into account the specific kind of connectome and the  
210 definition of the connection weights. On the other hand, these metrics have been commonly used in  
211 human studies of AD (Brier et al., 2014; Daianu et al., 2013; Fischer et al., 2015; Sanz-Arigita et al.,  
212 2010), and therefore, can provide comparable and translational results.

213 *Statistics. Longitudinal models.*

214 The main objective of our study was the research of alterations in the longitudinal evolution of the  
215 TgF344-AD brain networks with respect to the control group and its impact on cognition. Linear mixed  
216 effects (LME) models (Oberg & Mahoney, 2007) were used to model the influence of age and group in  
217 the network metrics and to identify differences in the effect of aging between the two groups. LME  
218 models include both fixed effect (parameters common to an entire population such as age or group) and  
219 random effects (subject-specific parameters modeling the subject deviation from the population).

LME was defined to regress each of the network metrics including group, age and the interaction between them as independent variables:

$$y_s = \beta_0 + \beta_1 \cdot group + \beta_2 \cdot age + \beta_3 \cdot group \cdot age + \beta_{4,s} + \xi, \quad s = 1, \dots, S \quad (1)$$

220 where  $y_s$  is the network metric in the subject  $s$  at a given age,  $s$  represents each of the  $S$  subjects,  $\beta_0$  is  
221 the global intercept,  $\beta_1, \beta_2, \beta_3$  the fixed effect parameters, assessing the influence of group, age and  
222 interaction respectively, and  $\beta_{4,s}$  the subject specific correction.  $\xi$  is the regression error term.

Multiple comparisons were corrected using false discovery rate (FDR) (Benjamin & Hochberg, 1995). The effects of group, age or interaction between age and group were considered significant if the corrected p-value ( $p_{FDR}$ ) was less than 0.05. When the interaction was significant, control and transgenic groups were modeled separately to evaluate the age effect in each group:

$$\begin{aligned} y_{s_{CTR}} &= \beta_{0,CTR} + \beta_{1,CTR} \cdot age + \beta_{2,s_{CTR}} + \xi_{CTR}, \quad s_{CTR} = 1, \dots, S_{CTR} \\ y_{s_{TG}} &= \beta_{0,TG} + \beta_{1,TG} \cdot age + \beta_{2,s_{TG}} + \xi_{TG}, \quad s_{TG} = 1, \dots, S_{TG} \end{aligned} \quad (2)$$

223 To complement the longitudinal analysis, differences in brain networks at each of the five acquisition  
224 time points were evaluated. Kruskal-Wallis tests were applied to identify statistically significant  
225 differences between whole-brain organization in transgenic and control groups. Multiple comparisons

226 were corrected using FDR (Benjamin & Hochberg, 1995). Together with this, Network-Based Statistics  
227 (NBS) toolbox (Zalesky, Fornito, & Bullmore, 2010) was used to identify specific networks of  
228 connections which differ between transgenic and control animals. NBS was performed with the  
229 following settings: t-test with a threshold of 3.1, 5000 permutations and a significance level of  $p < 0.05$ .

Finally, the relationship between connectivity and cognitive performance was evaluated fitting an LME model to test if such relation is significant and if it differs between the groups:

$$DNMS_s = \beta_0 + \beta_1 \cdot connectivity + \beta_2 \cdot group + \beta_3 \cdot connectivity \cdot group + \beta_{4,s} + \xi, \quad s = 1, \dots, S \quad (3)$$

230 where  $DNMS_s$  represents the result in the DNMS task (number of trials and percentage of correct  
231 responses) and connectivity refers to each of the network metrics. Thus, the relationship between  
232 cognitive outcome and each of the network parameters was evaluated. Multiple comparisons were  
233 corrected by FDR (Benjamin & Hochberg, 1995). When interaction was significant ( $p_{FDR} < 0.05$ ), the  
234 model was fitted separately to transgenic and control groups to test the significance of the relationship  
235 between the network metric and the cognitive outcome in each group.

## RESULTS

### 236 *Longitudinal analysis*

237 Linear mixed effects (LME) model was fitted to regress each of the network metrics and to evaluate  
238 significant effects of age, group or their interaction. Results are shown in Figure 1, where the whole  
239 distribution of data is shown (each point represents a time-point / subject), as well as the fitting of the  
240 LME model as a function of group and age. If a significant effect of the interaction between age and  
241 group was detected, the model was adjusted to each of the groups independently to fit the network metric  
242 as a function of age. Significant  $p_{FDR}$  values of each of the terms in the model (group, age and group-age  
243 interaction) are displayed in Figure 1. Supplementary Table 1 compiles  $p_{FDR}$  values and effect sizes  
244 (Cohen's  $f^2$ ) for the parameters of the LME model fitted to the whole cohort, and Supplementary Table 2  
245 shows  $p_{FDR}$  values and effect sizes (Cohen's  $f^2$ ,  $R^2$ ) of the model adjusted to each of the groups.

252 In FA-w connectome, group effect was significant in strength and clustering coefficient, but not  
253 significant interaction between group and age was detected. Both FA-w strength and clustering were

254 clearly decreased in the transgenic group. A significant increase of FA-w strength with age was observed,  
255 with a more notable slope in the case of transgenic animals.

256 The interaction between group and age was significant in FD-w strength, local efficiency and clustering  
257 coefficient. In all these cases, an increase with age in the transgenic group - significant in strength and  
258 clustering coefficient- was detected, opposite to the non-significant decrease observed in controls.  
259 Similar behavior was observed in the binary connectome, where significant age-group interaction was  
260 observed in all the network metrics, which were significantly affected by age in the transgenic group.

261 No significant effects of age, group or interaction were detected neither in functional connectivity nor  
262 in cognitive performance.

### 263 *Group differences by time points*

264 Figure 2 shows the distribution of network metrics between groups at each of the five acquisition time  
265 points, and the statistically significant differences. Significance was considered as  $p_{FDR} < 0.05$ . Only  
266 structural network metrics are shown, since no differences were found in functional connectomes.  
267 Supplementary Table 3 shows the  $p_{FDR}$  values and effect sizes ( $\eta^2$ ) of both structural and functional  
268 connectomes.

271 Most differences were observed at the earliest time point where FA-w and binary structural network  
272 metrics were significantly decreased in the transgenic group with respect to controls. Regarding the  
273 FD-w connectome, while a tendency to decreased values were observed in the transgenic group with  
274 respect to controls at the first time point, a significant increase was detected in strength, local efficiency  
275 and clustering coefficient at 15 months of age.

276 No significant differences were found in the functional network metrics.

277 Together with graph metrics we evaluate differences in network edges. Figure 3 shows the group  
278 average FA-w and functional weighted connectomes considering only the strongest connections  
279 (FA-w > 0.3 and  $z > 0.05$ , respectively) to provide an illustrative plot of the brain networks. Stronger and  
280 denser FA-w connections are observed in the control group in comparison with transgenic, especially in  
281 the last time point, although network metrics were not significantly different. A decrease in the  
282 connection strength with time in the transgenic brain can also be observed. Regarding the functional

283 connectome it can be seen that at 18 months of age,  $z > 0.05$  connections in the TgF344-AD brain are  
284 less and weaker. In previous time points connectivity is similar between both groups, and even higher  
285 strength in specific links can be observed in the transgenic brain.

289 To statistically identify differences in the network edges, NBS was applied. Resulting networks are  
290 shown in Figure 4. Differences were detected at 8 months of age (time point 2) in a subnetwork of the  
291 FD-w connectome (increased in transgenic animals) and at 15 months of age (time point 4) in FA-w and  
292 functional connectomes. While the subnetwork identified in the FA-w connectome was decreased in  
293 transgenic animals, subnetworks in the functional network were increased in this group. The list of  
294 regions between which connectivity was altered is shown in Supplementary Material.

#### 299 *Relationship between connectivity and cognition*

300 The effect of connectivity in cognitive results and if this effect was different in transgenic and control  
301 animals was evaluated using LME models.

302 Although no significant differences were observed in cognitive outcome between groups (see  
303 Supplementary Figure 3), it can be noted that: a) transgenic animals performed lower number of trials  
304 than control animals at the first time point and b) there is a high variability in the results of the transgenic  
305 group at the last time point, when the performance of some of the animals sharply falls. Besides, brain  
306 network organization had a significant impact on the cognitive results.

307 The interaction between FA-w strength and group had a significant effect in DNMS results  
308 ( $p_{inter} = 0.0223$ ). Considering the group specific model, this metric had a significant influence in the  
309 number of trials performed by the transgenic animals ( $p_{tg} = 0.0018$ ), but not in controls. Group and  
310 metric shown also a significant effect in cognitive outcome ( $p_{group} = 0.0203$  and  $p_{metric} = 0.0006$ ,  
311 respectively).

312 Similar results were observed considering any of the FD-w metrics (strength:  $p_{group} = 0.0098$ ,  
313  $p_{metric} = 0.0007$ ,  $p_{inter} = 0.0016$ ; local efficiency:  $p_{group} = 0.0098$ ,  $p_{metric} = 0.0005$ ,  $p_{inter} = 0.0167$ ;  
314 clustering coefficient:  $p_{group} = 0.0051$ ,  $p_{metric} = 1.97 \cdot 10^{-5}$ ,  $p_{inter} = 0.0065$ ) or binary metrics (degree:  
315  $p_{group} = 0.0051$ ,  $p_{metric} = 1.6 \cdot 10^{-5}$ ,  $p_{inter} = 0.0065$ ; global efficiency:  $p_{group} = 0.0051$ ,  
316  $p_{metric} = 1.6 \cdot 10^{-5}$ ,  $p_{inter} = 0.0065$ ; local efficiency:  $p_{group} = 0.0098$ ;  $p_{metric} = 4.4 \cdot 10^{-6}$ ,

317  $p_{inter} = 0.0064$ ; clustering coefficient:  $p_{group} = 0.0098$ ,  $p_{metric} = 4.4 \cdot 10^{-6}$ ,  $p_{inter} = 0.0064$ ), except for  
318 FD-w global efficiency ( $p_{group} = 0.0051$ ,  $p_{metric} = 0.0035$ ), where the interaction between group and  
319 metric was not significant. In all the cases, the higher the FD-w or structural binary network metrics, the  
320 more trials the transgenic animal performed (FD-w strength,  $p_{tg} = 0.0019$ ; local efficiency,  $p_{tg} = 0.0014$ ;  
321 clustering coefficient,  $p_{tg} = 6.54 \cdot 10^{-5}$  and binary degree,  $p_{tg} = 5.29 \cdot 10^{-5}$ ; global efficiency,  
322  $p_{tg} = 5.29 \cdot 10^{-5}$ ; local efficiency,  $p_{tg} = 1.26 \cdot 10^{-5}$ ; clustering coefficient  $p_{tg} = 1.26 \cdot 10^{-5}$ ). All the  
323 reported p-values are FDR corrected. Figure 5 shows FA-w, FD-w strength and structural degree (results  
324 are similar in all the mentioned metrics). More details are provided in Supplementary Tables 4 and 5.

328 As shown in Figure 5, the number of trials was significantly influenced by the interaction between  
329 group and functional weighted strength ( $p_{inter} = 0.0150$ ), global efficiency ( $p_{inter} = 0.0180$ ) and local  
330 efficiency ( $p_{inter} = 0.0167$ ). When specific group models were considered, the effect of functional  
331 strength in the cognitive performance was significant in the control animals ( $p_{ctr} = 0.0489$ ), but not in the  
332 transgenic cohort.

## DISCUSSION

333 There is a growing interest in the study of early stages of AD and its progression until symptomatic onset,  
334 since brain changes start decades before the clinical diagnosis (Dubois et al., 2016; Jack et al., 2018). To  
335 contribute to the understanding of these early brain changes and their progression during aging, the  
336 present study focuses on an animal model of the disease and describes the longitudinal evolution of  
337 structural and functional brain network organization from very early stages. Although recent studies have  
338 evaluated connectivity in population at risk of AD or in its preclinical phases in human cohorts (Berlot,  
339 Metzler-Baddeley, Ikram, Jones, & O'Sullivan, 2016; Farrar et al., 2017; Pereira et al., 2017), they  
340 focused on elderly or middle-aged subjects and in case of longitudinal analysis only short periods of time  
341 with respect to human life span have been evaluated. In the present study, the use of TgF344-AD rats  
342 allows the investigation of earlier alterations and to follow-up subjects during all their life span.  
343 Therefore, it can provide new insights into the disease progression and be helpful in the investigation of  
344 treatments and interventions.

345 Our results show differences between transgenic and control groups in the progression of the structural  
346 connectivity during aging. Alterations in the structural brain network of population at risk of AD or in its

347 preclinical phases in human cohorts of elderly or middle-aged subjects have been reported (Berlot et al.,  
348 2016; Chen et al., 2015; Farrar et al., 2017; Fischer et al., 2015; Pereira et al., 2017; Shu et al., 2015;  
349 Zhao et al., 2017), which are in line with the differences we have observed in TgF344-AD animals at  
350 equivalent ages (15 months). Furthermore, earlier alterations were observed in the animal model:  
351 structural connectivity differences were already present in young animals (six months of age). Together  
352 with this, differences in the evolution of the structural metrics were detected. While aging had no  
353 significant effect in the evolution of network metrics in the control group, it significantly affected metrics  
354 in the transgenic animals. In this group, network metrics increased linearly with age, but a decrease in the  
355 metric values at the last time point can be observed in Figure 1 and 2, although LME could not fit this  
356 change of trend. In spite of this global increment with age, FA-w network metrics in transgenic animals  
357 remain always lower than in controls, in line with which has been observed in preclinical or clinical  
358 phases of AD in aged patients (Chen et al., 2015; Pereira et al., 2017; Shu et al., 2015). Binary and FD-w  
359 metrics also increased significantly in transgenic animals during aging, but they were decreased with  
360 respect to controls only at early ages. Indeed, FD-w was increased in transgenic animals at 8 and 15  
361 months. This could be related with the hyperconnectivity effect described after brain injury and in  
362 preclinical phases of AD (Hillary & Grafman, 2017), explained as a mechanism to preserve  
363 communication in the network and minimize the behavioral deficits. Although hyperconnectivity has  
364 been mainly identified in functional networks, higher binary structural network properties were also  
365 described in APOE  $\epsilon$ 4 carriers before mild cognitive impairment (MCI) appears (Ma et al., 2017). Thus,  
366 to compensate the lower FA-w strength in the network, more connections would be established to  
367 preserve behavioral performance. In this line, the increase in FA-w network metrics with age observed in  
368 transgenic animals is probably related to the presence of more connections rather than to FA increase in  
369 the brain. The results obtained with NBS also points to this line. They showed hyperconnectivity in  
370 subnetworks of functional and FD-w connectomes, while decreased connectivity was observed in a  
371 subnetwork of the FA-w connectome. Namely, hyperconnectivity was detected in networks related with  
372 the processing of sensory inputs in both functional and FD-w connectome. The altered connections  
373 observed in the FD-w network are part of the limbic system and are responsible for the processing of  
374 different sensory inputs required to link emotions and memories. This could try to compensate the  
375 decrease observed in FA-w connectome in networks related to memory processing and executive  
376 functions.

377 Impairments in functional connectivity have been described in at risk, preclinical or clinical AD  
378 cohorts, but depending on methodological issues or cohort selection differences have been reported in  
379 opposed senses (Phillips, McGlaughlin, Ruth, Jager, & Soldan, 2015). Likewise, in the studied animal  
380 model, TgF344-AD, differences in connectivity between specific regions or networks have been reported  
381 (Anckaerts et al., 2019; Tudela et al., 2019) at several ages. In the present work, we focused on the  
382 analysis of brain network globally instead of evaluation of specific connections. From this point of view,  
383 the whole-brain network metrics describing integration and segregation of the functional connectomes  
384 did not significantly differ between control and transgenic groups. This could be related to three factors.  
385 First, the hyperconnectivity effect previously mentioned (Hillary & Grafman, 2017) between specific  
386 regions or networks to compensate damaged connections (hypo-connectivity). This effect has been  
387 described, for instance, in young APOE  $\epsilon 4$  carriers (Ma et al., 2017) or amnesic MCI patients (Kim et  
388 al., 2015). Since global network metrics involve averaging properties of all the connections (Rubinov &  
389 Sporns, 2010), decreased connections could be compensated by increased connections (such as the  
390 detected by NBS at 15 months of age), resulting in similar values of the global network metrics, as  
391 observed in our study. Second, the training and the repetition of the cognitive task could lead to a  
392 learning effect, increasing the cognitive reserve of these animals and therefore preserving the functional  
393 connectivity. Higher functional connectivity has been related with higher cognitive reserve in both  
394 healthy elders (Arenaza-Urquijo et al., 2013) and MCI patients (Franzmeier et al., 2017) with respect to  
395 subjects with low cognitive reserve. This fact could also be related with the absence of significant  
396 differences in the cognitive outcome. Nevertheless, further investigation on animals not undergoing  
397 DNMS should be performed to confirm this hypothesis. Finally, the third factor that could influence the  
398 absence of functional connectivity differences could be the disease timing. Brain changes as amyloid- $\beta$   
399 concentration and neural loss in TgF344-AD have been described from 16 months of age in Cohen et al.  
400 (2013) and significant cognitive impairment is mainly described from 15 months (Cohen et al., 2013;  
401 Tsai et al., 2014) although tendencies to impairment or differences in anxiety or learning abilities have  
402 been reported at earlier stages (Cohen et al., 2013; Muñoz-Moreno et al., 2018; Pentkowski et al., 2018).  
403 Actually, an increase in variability of the cognitive outcome was observed at 18 months of age, when  
404 some of the transgenic animals performed much worse than at previous ages. This suggests that the  
405 symptomatic onset occurs around 18 months of age, and before this age, functional connectivity might  
406 compensate the structural network damage resulting in similar functional network metrics than in control

407 animals. The observed significant relation between structural network metrics and cognitive performance  
408 could be related with the ability of functional connectivity to cope with the structural disconnection  
409 preserving cognition, until a breakpoint when it is not able to deal with extensive structural network  
410 damage. This relationship between structural connectivity and cognition has been also described in MCI  
411 subjects (Berlot et al., 2016; Farrar et al., 2017) and in cognitive normal individuals harboring amyloid  
412 pathology and neurodegeneration (Pereira et al., 2017), while no correlation was observed in control  
413 subjects. Coherently, structural connectivity did not correlate with DNMS in our control cohort, where  
414 correlation between DNMS and functional connectivity was observed.

#### 415 *Strengths and limitations*

416 The use of MRI-based connectomics to longitudinally analyse the brain network in an animal model of  
417 AD provides a valuable and highly translational approach to the research on the mechanism of the  
418 disease progression, since the applied methodology can be easily translated to clinical investigation.  
419 Besides, animal models allows for characterization and follow-up of the same cohort from early stages  
420 until advanced phases of the disease. Indeed, the model used in our experiments, the Tg344-AD rats, has  
421 been shown to develop all the AD pathological hallmarks in a progressive manner, which makes it  
422 especially suitable for longitudinal evaluation.

423 The use of graph metrics allows for comparison between alterations observed in the animal model and  
424 previous results in human cohorts in literature. This is essential to validate how the animal model mimics  
425 the pathology in patients. It is also a critical point to allow translationality between preclinical and  
426 clinical trials in the research for AD treatments (Drummond & Wisniewski, 2017; Sabbagh et al., 2013).  
427 Our results are coherent with those observed in elderly or middle-aged human cohorts, and provide  
428 further information about earlier brain alterations and the pattern of disconnection associated with AD  
429 progression. Furthermore, the use of a rat model allows for better behavioral characterization than other  
430 animal models (Do Carmo & Cuello, 2013). This makes possible to perform cognitive evaluation of  
431 memory related functions and relate animal performance with brain connectivity. Our results revealed  
432 that the influence of brain network organization in cognitive abilities differs between transgenic and  
433 control animals.



434 Regarding the limitations of the study, the relatively small number of subjects could limit the statistical  
435 analysis. However, the measures were repeated at 5 time points, which increases the sample size  
436 evaluated by the longitudinal models to 80 observations. Note that our main results are based on models  
437 fitted to all these observations. Small sample could have a bigger impact on the complementary analysis  
438 at specific time points, but even with this limitation significant differences between the groups were  
439 detected after multiple comparison correction. These differences were coherent with previous findings  
440 observed in bigger cohorts from human population. Nevertheless, the small sample size could hamper the  
441 statistical analysis and be related, for instance, with the lack of significant differences at the last time  
442 point.

443 MRI protocols were optimized to achieve a compromise between sensitivity, image quality and  
444 acquisition time. After optimization, TE of the gradient-echo BOLD acquisition was set to 10.75 ms.  
445 Although it is slightly shorter than common echo-times used to sensitize images to BOLD variations, the  
446 analysis of the resulting BOLD signal showed patterns of connectivity consistent with previous  
447 knowledge, as shown in Supplementary Figure 2. Resting-state acquisitions were acquired using  
448 medetomidine as sedation, which was considered to preserve connectivity networks better than isoflurane  
449 anesthesia (Kalthoff, Po, Wiedermann, & Hoehn, 2013). However, recent studies have thoroughly  
450 investigated the effect of anesthesia in brain function during resting-state, and suggested that the use of  
451 only medetomidine could hinder brain function which has been observed in awake animals. These new  
452 findings should be taken into account in new experimental protocols, and could lead to additional  
453 conclusions that complement our analysis.

454 On the other hand, we would like to mention that all animals in the study repeated the DNMS task  
455 every three months, which allows for evaluation of cognitive skills. Results point to a learning effect and  
456 increase in cognitive reserve due to such repetition. However, further experiments including animals  
457 which do not perform DNMS should be carried out for a more thorough evaluation of such an effect.

458 Finally, the last time point evaluated in our study was 18 months of age. Brain changes and cognitive  
459 impairment in the TgF344-AD have been described mainly from 15 months of age, what, as previously  
460 discussed, could be related with the absence of differences in cognition or functional connectivity.  
461 Therefore, further investigation describing connectivity at later time points would be of great interest to  
462 characterize more advanced stages of the disease.

## CONCLUSIONS

463 Aging had more notable impact on the structural connectivity of the TgF344-AD rats, which is altered  
464 from early ages, than in control animals. Besides, differences in anatomical networks directly affected  
465 the cognitive outcome of the transgenic animals, even before the symptomatic onset. These findings are  
466 in line with results observed in middle-aged or elderly human population at risk of AD, and complement  
467 them with insights into earlier stages and a plot of the effects of the disease along the whole life span.  
468 The results support the idea of AD as a disconnection syndrome and AD as a continuum, suggesting that  
469 brain damage is already present at early stages, long before the symptomatic onset.

470 The impact of the altered anatomical connectivity in cognitive skills could be moderated by functional  
471 network reorganization until advanced stages of the disease. This suggests the relevance of cognitive  
472 reserve to prevent or mitigate the symptomatic onset in subjects affected by the disease. TgF344-AD  
473 model could therefore be a convenient model to perform translational research of the impact of cognitive  
474 interventions in AD.

## ACKNOWLEDGMENTS

475 This work has been funded by grants PI14/00595 and PI18/00893, integrated into Plan Nacional I+D+I  
476 and co-funded by ISCIII-Subdirección General de Evaluación and European Regional Development  
477 Fund (ERDF). It was also funded by Fundació La Marató de TV3 (201441 10). Consorcio Centro de  
478 Investigación Biomédica en Red (CIBER) de Bioingeniería, Biomateriales y Nanomedicina  
479 (CIBER-BBN) is an initiative financed by the Instituto de Salud Carlos III with assistance from the  
480 ERDF. With the support of Secretaria d'Universitats i Recerca del Departament d'Empresa i  
481 Coneixement de la Generalitat de Catalunya (AGAUR 2017 SGR 01003). The work was also funded by  
482 InMind project financed by the European Community (FP7-HEALTH-2011.2.2.1-2, n 278850).  
483 TgF344-AD rats were obtained through the InMind Consortium following kind donation by Dr. T. Town.

## AUTHOR CONTRIBUTIONS

484 All authors were involved in the conception and design of the project and manuscript writing and editing.  
485 GS and XLG was involved in data acquisition. XLG was in charge of the animal care and cognitive  
486 training and evaluation. GS, RT and EMM contribute to data interpretation. EMM performed the MRI

487 processing and connectivity analysis and was a major contributor to the writing of the manuscript. All  
488 authors read and approved the final manuscript.

489

490

## REFERENCES

491

- 492 Anckaerts, C., Blockx, I., Summer, P., Michael, J., Hamaide, J., Kreutzer, C., . . . Van der Linden, A. (2019). Early  
493 functional connectivity deficits and progressive microstructural alterations in the TgF344-AD rat model of Alzheimer's  
494 Disease: A longitudinal MRI study. *Neurobiology of Disease*, *124*, 93–107.
- 495 Arenaza-Urquijo, E. M., Landeau, B., La Joie, R., Mevel, K., Mézence, F., Perrotin, A., . . . Chételat, G. (2013).  
496 Relationships between years of education and gray matter volume, metabolism and functional connectivity in healthy  
497 elders. *NeuroImage*, *83*, 450–457.
- 498 Avants, B. B., Epstein, C. L., Grossman, M., & Gee, J. C. (2008). Symmetric diffeomorphic image registration with  
499 cross-correlation: Evaluating automated labeling of elderly and neurodegenerative brain. *Medical Image Analysis*, *12*,  
500 26–41.
- 501 Badhwar, A. P., Tam, A., Dansereau, C., Orban, P., Hoffstaedter, F., & Bellec, P. (2017). Resting-state network dysfunction  
502 in Alzheimer's disease: A systematic review and meta-analysis. *Alzheimer's & Dementia: Diagnosis, Assessment &*  
503 *Disease Monitoring*, *8*, 73–85.
- 504 Benjamin, Y., & Hochberg, Y. (1995). Controlling the false discovery rate: a practical and powerful approach to multiple  
505 testing. *Journal of the Royal Statistical Society. Series B (Methodological)*, *57*(1), 289–300.
- 506 Berlot, R., Metzler-Baddeley, C., Ikram, M. A., Jones, D. K., & O'Sullivan, M. J. (2016). Global efficiency of structural  
507 networks mediates cognitive control in mild cognitive impairment. *Frontiers in Aging Neuroscience*, *8*, 292.
- 508 Brier, M. R., Thomas, J. B., Fagan, A. M., Hassenstab, J., Holtzman, D. M., Benzinger, T. L., . . . Ances, B. M. (2014).  
509 Functional connectivity and graph theory in preclinical Alzheimer's disease. *Neurobiology of Aging*, *35*(4), 757–768.
- 510 Cacciaglia, R., Molinuevo, J. L., Falcón, C., Brugulat-Serrat, A., Sánchez-Benavides, G., Gramunt, N., . . . Gispert, J. D.  
511 (2018). Effects of APOE- $\epsilon$ 4 allele load on brain morphology in a cohort of middle-aged healthy individuals with enriched  
512 genetic risk for Alzheimer's disease. *Alzheimer's & Dementia*, *14*(7), 902–912.
- 513 Chen, Y., Chen, K., Zhang, J., Li, X., Shu, N., Wang, J., . . . Reiman, E. M. (2015). Disrupted functional and structural  
514 networks in cognitively normal elderly subjects with the APOE  $\epsilon$ 4 allele. *Neuropsychopharmacology*, *40*, 1181–1191.

- 515 Cohen, R. M., Rezai-Zadeh, K., Weitz, T. M., Rentsendorj, A., Gate, D., Spivak, I., . . . Town, T. C. (2013). A transgenic  
516 Alzheimer rat with plaques, tau pathology, behavioral impairment, oligomeric A $\beta$  and frank neuronal loss. *Journal of*  
517 *Neuroscience*, 33(15), 6245–6256.
- 518 Daianu, M., Jahanshad, N., Nir, T. M., Toga, A. W., Jack, C. R., Weiner, M. W., . . . Initiative, A. D. N. (2013). Breakdown  
519 of brain connectivity between normal aging and Alzheimer’s disease: a structural k-core network analysis. *Brain*  
520 *connectivity*, 3(4), 407–22.
- 521 Do Carmo, S., & Cuello, A. C. (2013). Modeling Alzheimer’s disease in transgenic rats. *Molecular Neurodegeneration*,  
522 8(1), 37.
- 523 Drummond, E., & Wisniewski, T. (2017). Alzheimer’s disease: experimental models and reality. *Acta Neuropathologica*,  
524 133(2), 155–175.
- 525 Dubois, B., Hampel, H., Feldman, H. H., Scheltens, P., Aisen, P., Andrieu, S., . . . Jack, C. R. (2016). Preclinical  
526 Alzheimer’s disease: Definition, natural history, and diagnostic criteria. *Alzheimer’s & Dementia*, 12(3), 292–323.
- 527 Farrar, D. C., Mian, A. Z., Budson, A. E., Moss, M. B., Koo, B. B., & Killiany, R. J. (2017). Retained executive abilities in  
528 mild cognitive impairment are associated with increased white matter network connectivity. *European Radiology*, 28,  
529 340–347.
- 530 Fischer, F. U., Wolf, D., Scheurich, A., & Fellgiebel, A. (2015). Altered whole-brain white matter networks in preclinical  
531 Alzheimer’s disease. *NeuroImage: Clinical*, 8, 660–666.
- 532 Fornito, A., Zalesky, A., & Breakspear, M. (2013). Graph analysis of the human connectome: promise, progress, and  
533 pitfalls. *NeuroImage*, 80, 426–44.
- 534 Franzmeier, N., Caballero, M. Á. A., Taylor, A. N. W., Simon-Vermot, L., Buerger, K., Ertl-Wagner, B., . . . Ewers, M.  
535 (2017). Resting-state global functional connectivity as a biomarker of cognitive reserve in mild cognitive impairment.  
536 *Brain Imaging and Behavior*, 11(2), 368–382.
- 537 Frisoni, G. B., Fox, N. C., Jack, C. R., Scheltens, P., & Thompson, P. M. (2010). The clinical use of structural MRI in  
538 Alzheimer disease. *Nature Reviews Neurology*, 6(2), 67–77.
- 539 Galeano, P., Martino Adami, P. V., Do Carmo, S., Blanco, E., Rotondaro, C., Capani, F., . . . Morelli, L. (2014).  
540 Longitudinal analysis of the behavioral phenotype in a novel transgenic rat model of early stages of Alzheimer’s disease.

541 *Frontiers in Behavioral Neuroscience*, 8, 321.

542 Garyfallidis, E., Brett, M., Amirbekian, B., Rokem, A., van der Walt, S., Descoteaux, M., & Nimmo-Smith, I. (2014). Dipy,  
543 a library for the analysis of diffusion MRI data. *Frontiers in Neuroinformatics*, 8, 8.

544 Gomez-Ramirez, J., & Wu, J. (2014). Network-based biomarkers in Alzheimer's disease: Review and future directions.  
545 *Frontiers in Aging Neuroscience*, 6, 12.

546 Gour, N., Felician, O., Didic, M., Koric, L., Gueriot, C., Chanoine, V., . . . Ranjeva, J. P. (2014). Functional connectivity  
547 changes differ in early and late-onset Alzheimer's disease. *Human Brain Mapping*, 35(7), 2978–2994.

548 Habib, M., Mak, E., Gabel, S., Su, L., Williams, G. B., Waldman, A., . . . O'Brien, J. T. (2017). Functional neuroimaging  
549 findings in healthy middle-aged adults at risk of Alzheimer's disease. *Ageing Research Reviews*, 36, 88–104.

550 Hillary, F. G., & Grafman, J. H. (2017). Injured brains and adaptive networks: The benefits and costs of hyperconnectivity.  
551 *Trends in Cognitive Sciences*, 21(5), 385–401.

552 Jack, C. R., Barnes, J., Bernstein, M. A., Borowski, B. J., Brewer, J., Clegg, S., . . . Weiner, M. W. (2015). Magnetic  
553 resonance imaging in Alzheimer's Disease Neuroimaging Initiative 2. *Alzheimer's & Dementia*, 11(7), 740–756.

554 Jack, C. R., Bennett, D. A., Blennow, K., Carrillo, M. C., Dunn, B., Haeberlein, S. B., . . . Silverberg, N. (2018). NIA-AA  
555 Research Framework: Toward a biological definition of Alzheimer's disease. *Alzheimer's & Dementia*, 14(4), 535–562.

556 Kalthoff, D., Po, C., Wiedermann, D., & Hoehn, M. (2013). Reliability and spatial specificity of rat brain sensorimotor  
557 functional connectivity networks are superior under sedation compared with general anesthesia. *NMR in Biomedicine*,  
558 26(6), 638–650.

559 Kim, H., Yoo, K., Na, D. L., Seo, S. W., Jeong, J., & Jeong, Y. (2015). Non-monotonic reorganization of brain networks  
560 with Alzheimer's disease progression. *Frontiers in Aging Neuroscience*, 7, 1–10.

561 Leon, W. C., Canneva, F., Partridge, V., Allard, S., Ferretti, M. T., DeWilde, A., . . . Cuello, a. C. (2010). A novel transgenic  
562 rat model with a full Alzheimer's-like amyloid pathology displays pre-plaque intracellular amyloid-beta-associated  
563 cognitive impairment. *Journal of Alzheimer's disease*, 20(1), 113–126.

564 Lo, C.-y., Wang, P.-n., Chou, K.-h., Wang, J., He, Y., & Lin, C.-p. (2010). Diffusion tensor tractography reveals abnormal  
565 topological organization in structural cortical networks in Alzheimer's disease. *Journal of Neuroscience*, 30(50),

566 16876–16885.

567 Ma, C., Wang, J., Zhang, J., Chen, K., Li, X., Shu, N., . . . Zhang, Z. (2017). Disrupted brain structural connectivity:  
568 Pathological interactions between genetic APOE  $\epsilon$ 4 status and developed MCI condition. *Molecular Neurobiology*, *54*(9),  
569 6999–7007.

570 Mak, E., Gabel, S., Mirette, H., Su, L., Williams, G. B., Waldman, A., . . . O'Brien, J. (2017). Structural neuroimaging in  
571 preclinical dementia: From microstructural deficits and grey matter atrophy to macroscale connectomic changes. *Ageing*  
572 *Research Reviews*, *35*, 250–264.

573 Muñoz-Moreno, E., Tudela, R., López-Gil, X., & Soria, G. (2018). Early brain connectivity alterations and cognitive  
574 impairment in a rat model of Alzheimer's disease. *Alzheimer's Research & Therapy*, *10*, 16.

575 Oberg, A. L., & Mahoney, D. W. (2007). Linear mixed effects models. In *Methods in molecular biology: Topics in*  
576 *biostatistics* (Vol. 404, pp. 213–234). Humana Press Inc., Totowa, NJ.

577 Palesi, F., Castellazzi, G., Casiraghi, L., Sinforiani, E., Vitali, P., Wheeler-Kingshott, C. A. G., & Angelo, E. D. (2016).  
578 Exploring patterns of alteration in Alzheimer's disease brain networks: a combined structural and functional  
579 connectomics analysis. *Frontiers in Neuroscience*, *10*, 380.

580 Pentkowski, N. S., Berkowitz, L. E., Thompson, S. M., Drake, E. N., Olguin, C. R., & Clark, B. J. (2018). Anxiety-like  
581 behavior as an early endophenotype in the TgF344-AD rat model of Alzheimer's disease. *Neurobiology of Aging*, *61*,  
582 169–176.

583 Pereira, J. B., van Westen, D., Stomrud, E., Strandberg, T. O., Volpe, G., Westman, E., & Hansson, O. (2017). Abnormal  
584 structural brain connectome in individuals with preclinical Alzheimer's disease. *Cerebral Cortex*, *28*(10), 3638–3649.

585 Phillips, D. J., McGlaughlin, A., Ruth, D., Jager, L. R., & Soldan, A. (2015). Graph theoretic analysis of structural  
586 connectivity across the spectrum of Alzheimer's disease: The importance of graph creation methods. *NeuroImage:*  
587 *Clinical*, *7*, 377–390.

588 Power, J. D., Plitt, M., Laumann, T. O., & Martin, A. (2017). Sources and implications of whole-brain fMRI signals in  
589 humans. *NeuroImage*, *146*, 609–625.

590 Reiter, K., Nielson, K. A., Durgerian, S., Woodard, J. L., Smith, J. C., Seidenberg, M., . . . Rao, S. M. (2017). Five-Year  
591 longitudinal brain volume change in healthy elders at genetic risk for Alzheimer's disease. *Journal of Alzheimer's*

- 592 *Disease*, 55(4), 1363 – 1377.
- 593 Rubinov, M., & Sporns, O. (2010). Complex network measures of brain connectivity: uses and interpretations. *NeuroImage*,  
594 52(3), 1059–1069.
- 595 Sabbagh, J. J., Kinney, J. W., & Cummings, J. L. (2013). Alzheimer’s disease biomarkers in animal models: closing the  
596 translational gap. *American journal of neurodegenerative disease*, 2(2), 108–120.
- 597 Sanz-Arigita, E. J., Schoonheim, M. M., Damoiseaux, J. S., Rombouts, S. A. R. B., Maris, E., Barkhof, F., . . . Stam, C. J.  
598 (2010). Loss of ‘small-world’ networks in Alzheimer’s disease: graph analysis of fMRI resting-state functional  
599 connectivity. *PLoS ONE*, 5(11), e13788.
- 600 Schwarz, A. J., Danckaert, A., Reese, T., Gozzi, A., Paxinos, G., Watson, C., . . . Bifone, A. (2006). A stereotaxic MRI  
601 template set for the rat brain with tissue class distribution maps and co-registered anatomical atlas: application to  
602 pharmacological MRI. *NeuroImage*, 32(2), 538–50.
- 603 Shu, N., Li, X., Ma, C., Zhang, J., Chen, K., Liang, Y., . . . Zhang, Z. (2015). Effects of APOE promoter polymorphism on  
604 the topological organization of brain structural connectome in nondemented elderly. *Human Brain Mapping*, 36(12),  
605 4847–4858.
- 606 Supekar, K., Menon, V., Rubin, D., Musen, M., & Greicius, M. D. (2008). Network analysis of intrinsic functional brain  
607 connectivity in Alzheimer’s disease. *PLoS Computational Biology*, 4(6), e1000100.
- 608 ten Kate, M., Sanz-Arigita, E. J., Tijms, B. M., Wink, A. M., Clerique, M., Garcia-Sebastian, M., . . . Barkhof, F. (2016).  
609 Impact of APOE- $\epsilon$ 4 and family history of dementia on gray matter atrophy in cognitively healthy middle-aged adults.  
610 *Neurobiology of Aging*, 38, 14–20.
- 611 Tsai, Y., Lu, B., Ljubimov, A. V., Girman, S., Ross-Cisneros, F. N., Sadun, A. A., . . . Wang, S. (2014). Ocular changes in  
612 TGF344-AD rat model of Alzheimer’s disease. *Investigative Ophthalmology and Visual Science*, 55(1), 523–534.
- 613 Tudela, R., Muñoz-Moreno, E., Sala-Llonch, R., López-Gil, X., & Soria, G. (2019). Resting state networks in the  
614 TgF344-AD rat model of Alzheimer’s disease are altered from early stages. *Frontiers in Aging Neuroscience*, 11, 213.
- 615 Valdés-Hernández, P. A., Sumiyoshi, A., Nonaka, H., Haga, R., Aubert-Vásquez, E., Ogawa, T., . . . Kawashima, R. (2011).  
616 An in vivo MRI template set for morphometry, tissue segmentation, and fMRI localization in rats. *Frontiers in*  
617 *Neuroinformatics*, 5, 26.



- 618 Wee, C.-Y., Yap, P.-T., Li, W., Denny, K., Browndyke, J. N., Potter, G. G., ... Shen, D. (2011). Enriched white matter  
619 connectivity networks for accurate identification of MCI patients. *NeuroImage*, *54*(3), 1812–22.
- 620 Weston, P. S. J., Simpson, I. J. A., Ryan, N. S., Ourselin, S., & Fox, N. C. (2015). Diffusion imaging changes in grey matter  
621 in Alzheimer's disease: a potential marker of early neurodegeneration. *Alzheimer's Research & Therapy*, *7*, 47.
- 622 Windisch, M. (2014). We can treat Alzheimer's disease successfully in mice but not in men: Failure in translation? A  
623 perspective. *Neurodegenerative Diseases*, *13*(2-3), 147–150.
- 624 Xie, T., & He, Y. (2012). Mapping the Alzheimer's brain with connectomics. *Frontiers in Psychiatry*, *2*, 77.
- 625 Zalesky, A., Fornito, A., & Bullmore, E. T. (2010). NeuroImage Network-based statistic : Identifying differences in brain  
626 networks. *NeuroImage*, *53*(4), 1197–1207.
- 627 Zhao, T., Sheng, C., Bi, Q., Niu, W., Shu, N., & Han, Y. (2017). Age-related differences in the topological efficiency of the  
628 brain structural connectome in amnesic mild cognitive impairment. *Neurobiology of Aging*, *59*, 144–155.

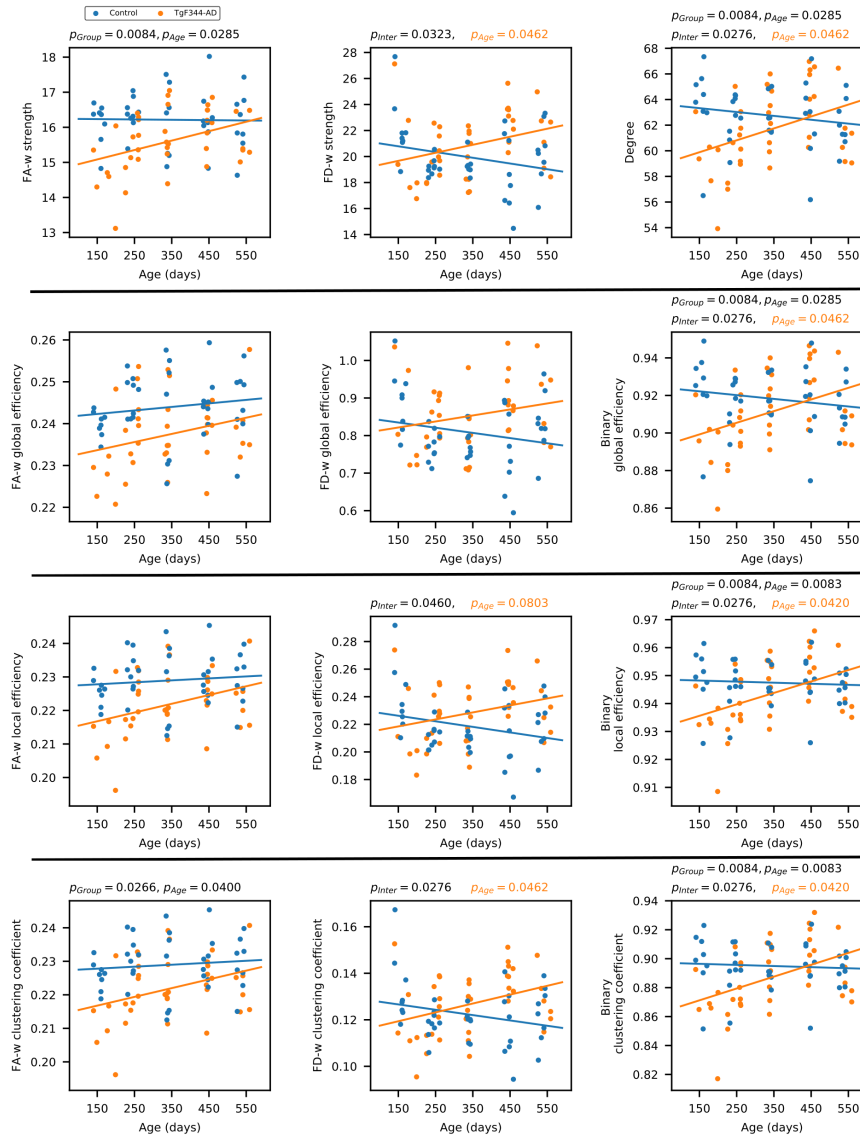

246 **Figure 1.** Global network metrics of the structural connectome. Strength, global and local efficiency and average clustering coefficient of the three structural  
 247 connectomes (fractional anisotropy-weighted, fiber density weighted and binary connectomes). For each network metric, each dot represents the value of one  
 248 animal at one time point (blue: control, orange: TgF344-AD). Blue and orange lines represents the fit of the linear mixed effects model;  $p_{FDR}$  values are  
 249 shown for significant effects ( $p_{group}$  group effect,  $p_{age}$  age effect,  $p_{Inter}$  effect of the interaction between age and group). If interaction was significant  
 250 group models were fitted to the data, in orange,  $p_{FDR}$  values of the effect of age in the LME model fitted to the transgenic group (no significant effects were  
 251 observed in the control group).

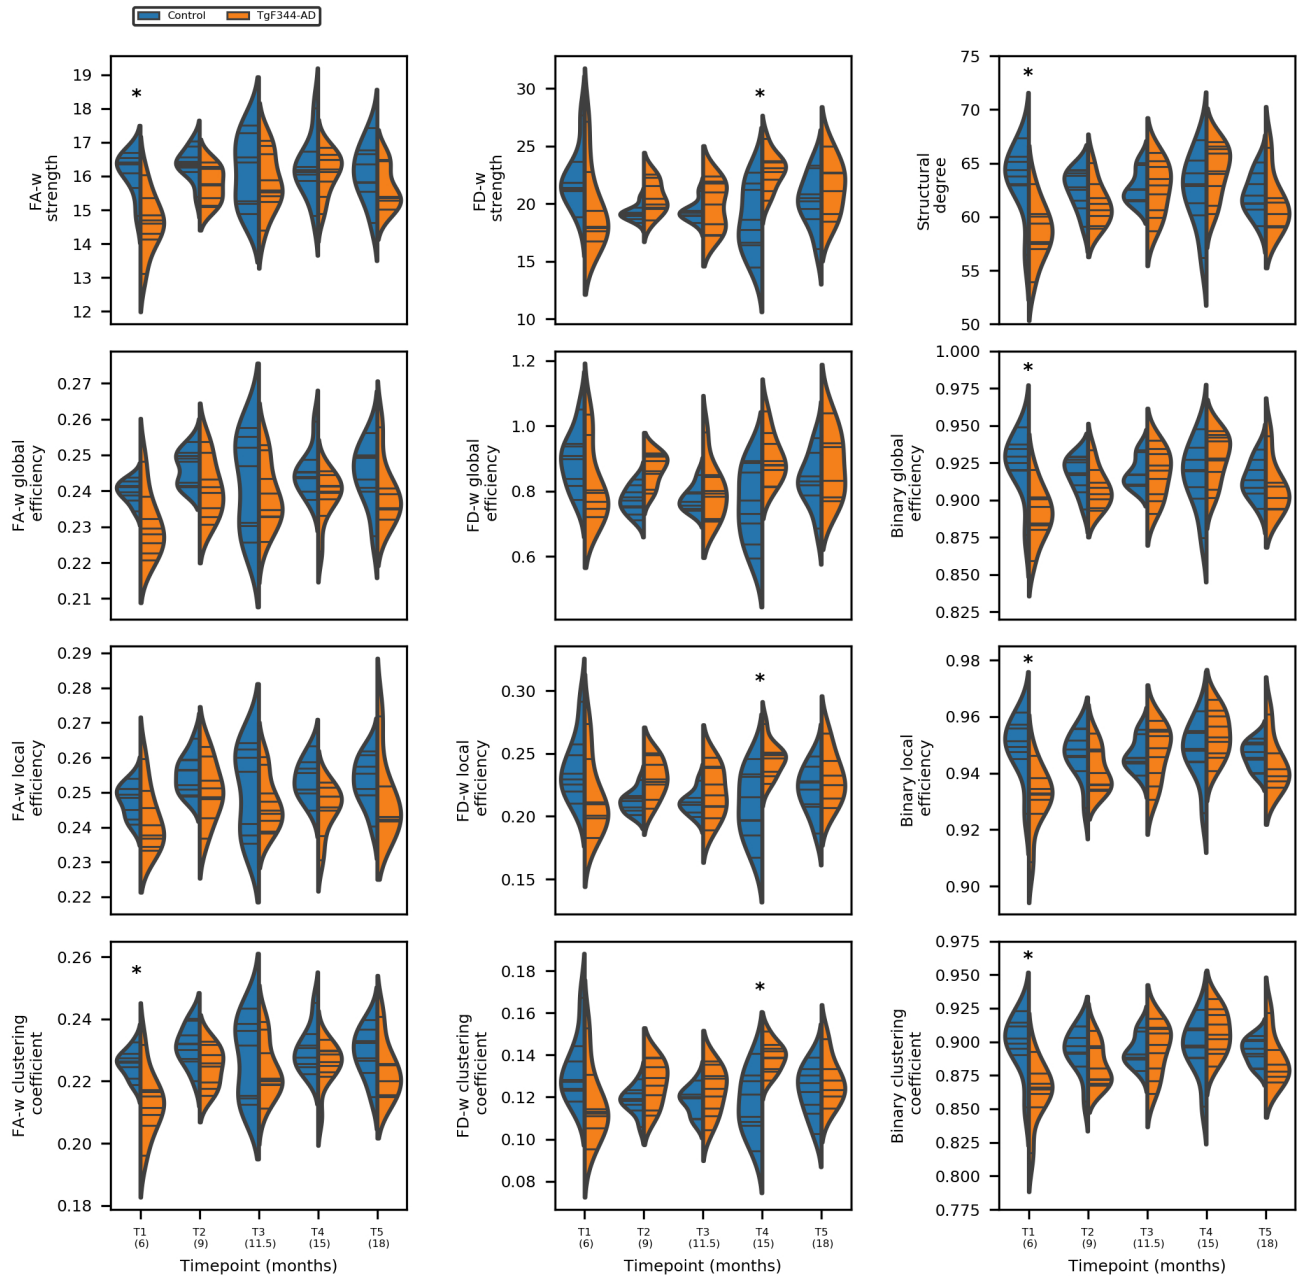

269 **Figure 2.** Network metrics of the three structural connectomes (fractional anisotropy weighted, fiber density weighted and binary connectome) in control  
270 (blue) and transgenic (orange) groups at each of the five time points. \* represents statistically significant difference ( $p_{FDR} < 0.05$ )

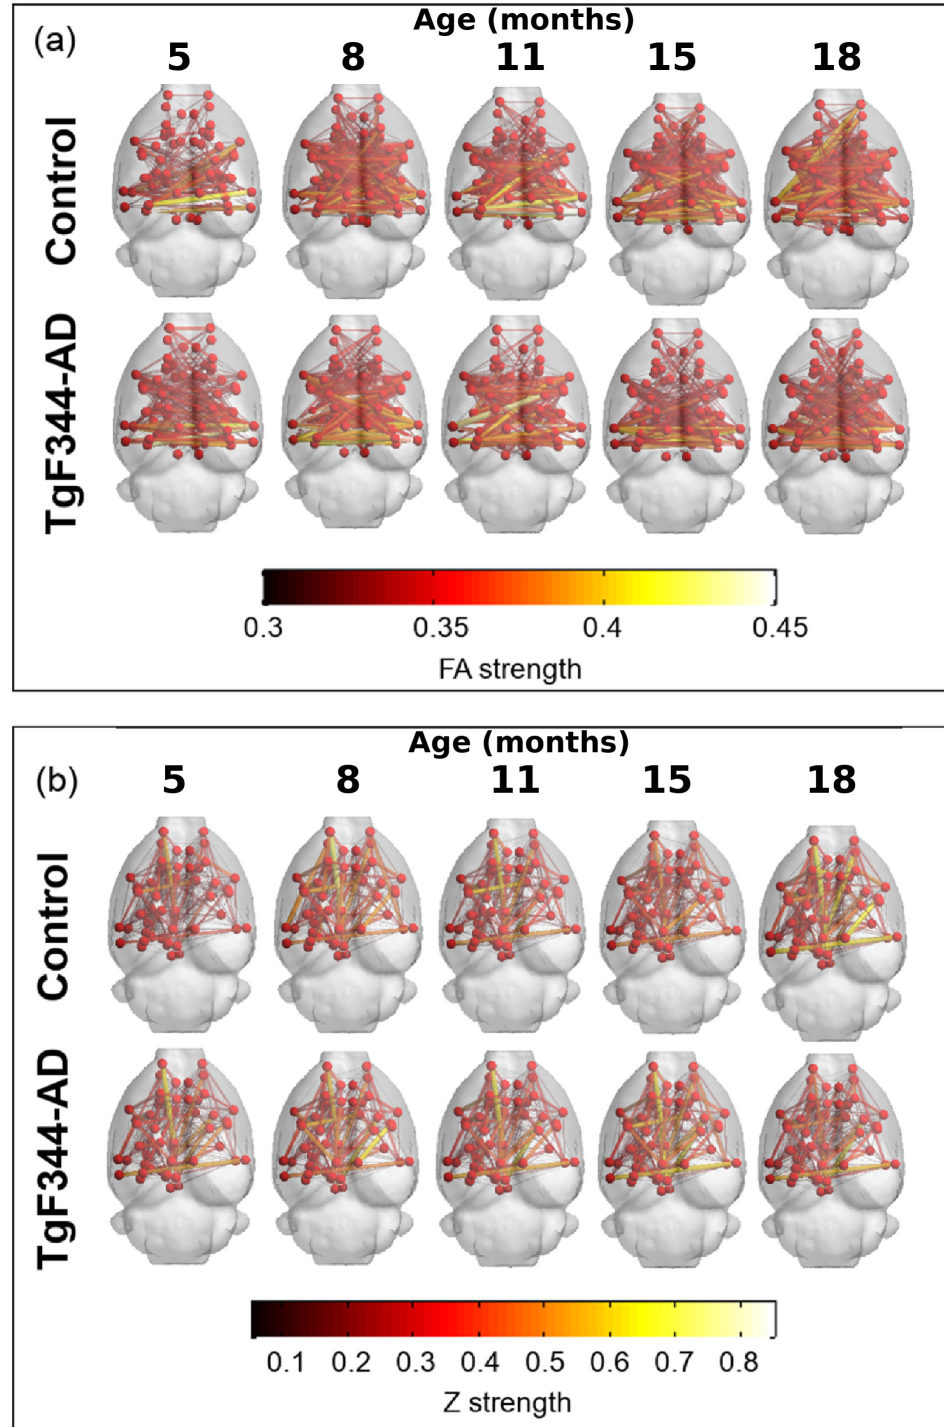

286 **Figure 3.** Average structural and functional brain networks. (a) Group average of the FA-w connectome; (b) group average of the functional weighted  
287 connectome at each time point. Only the strongest connections are plotted ( $FA-w > 0.3$  and  $z > 0.05$ ). Color and width of the links represent connection  
288 strength.

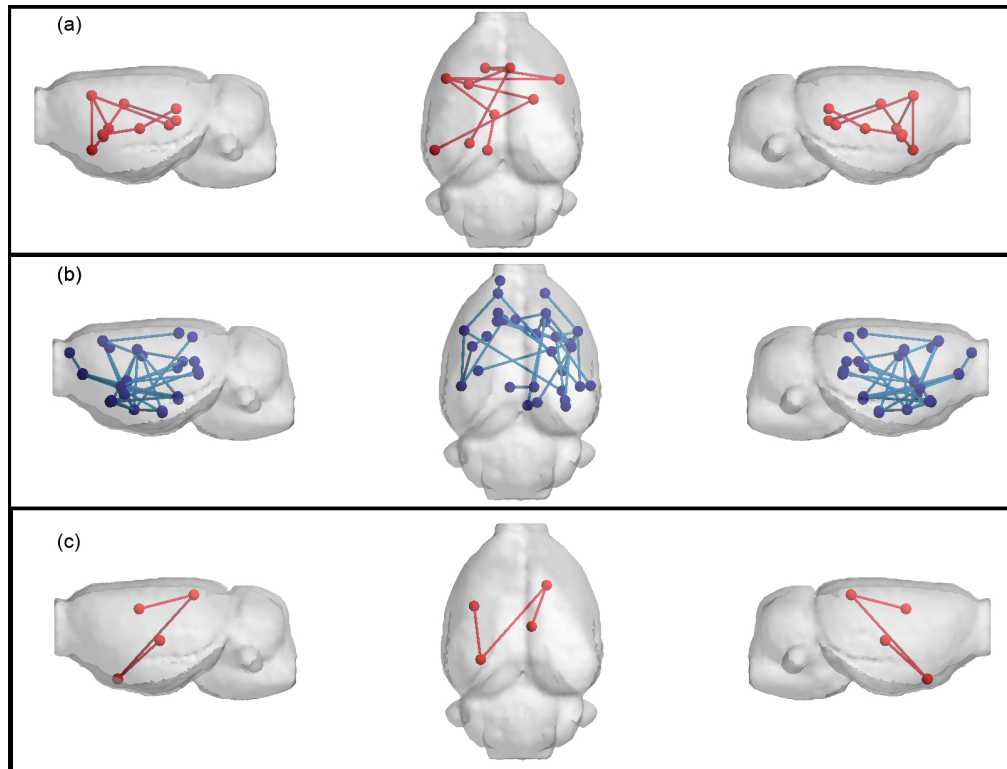

295 **Figure 4.** Networks altered in TgF344-AD animals resulting from NBS analysis. a) FD-w connectome at 8 months of age, altered connections are related to  
 296 limbic system; b) FA-w connectome at 15 months of age, connections related to memory processing and executive functions; c) functional connectome at 15  
 297 months of age, connections related to processing of sensory inputs. Red indicates subnetwork increased in the transgenic group; blue, subnetwork decreased in  
 298 the transgenic group.

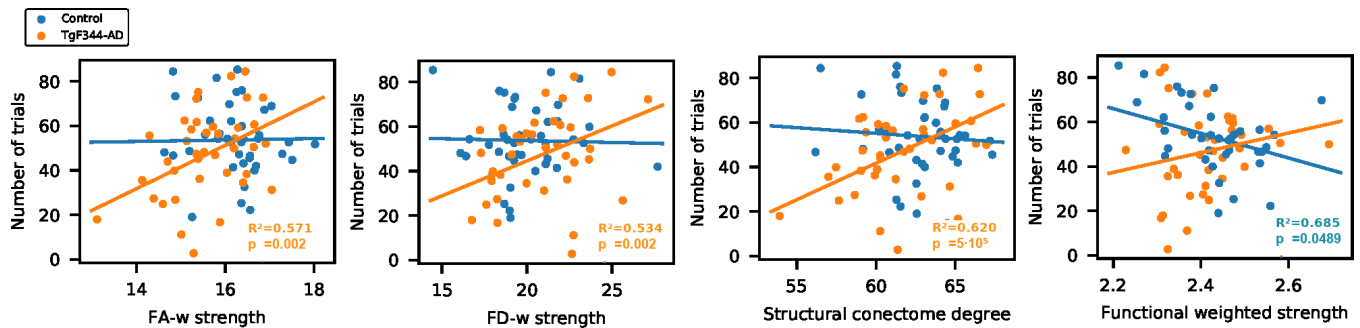

325 **Figure 5.** Cognitive performance and network metrics. Linear mixed model fit of DNMS result as a function of network metric and group. Relationship  
 326 between the structural and functional connectome metrics and number of trials performed in DNMS test. R-squared and  $p_{FDR}$  in case of significant metric  
 327 effect (orange: significance in TgF344-AD group; blue: significance in control group).
